# Supplementary material for: Effects of super-class cannabis terpenes beta-caryophyllene and alpha-pinene on zebrafish behavioural biomarkers
Source: Sci Rep. 2022 Oct 14;12:17250. doi: 10.1038/s41598-022-21552-2 (PMC9568608; doi:10.1038/s41598-022-21552-2)
Supplement: Supplementary file 2 — Supplementary Information 2. [file 41598_2022_21552_MOESM2_ESM.xlsx]

## Sheet: (+ -) aPN OF Inner Zone
0	0.01	0.02	0.1
0.88	2.84	8.08	12.44
12.52	2.12	3.28	10.84
5.84	18.64	2.32	0.88
1.36	5.52	56.8	6.6
1.92	3.6	8.68	8.96
4.2	2.04	2.48	6.2
4.84	8.8	1.4	6.64
2.76	1.84	0	5.12
15.44	13.2	4.12	55.6
1.6	3.68	2.8	5.08
1.76	2.64	4.08	31.24
0.88	1.24	10.36	13.44
5.36	51.8	7.76	15.44
0.6	0.72	23.92	11.24
7.28	17	6.52	5
7.08	48.56	3.68	2.44
3	58.96	9.8	14.88
4.68	2.56	2.12	22.88
1.64	2.24	18.36	9.64
1.92	7.4	8.96	2.12
6.48	42.64	10.68
17.8	4.72	1.12
5.8	10.28	1.76
14.84		1.28
16.36
0.88
0.68
9
3.8
1
18.04
3

## Sheet: (+ -) aPN OF Outer Zone
0	0.01	0.02	0.1
448.92	563.2	548.24	536.68
486.16	550.8	565.28	553.36
559.8	446.24	585.56	588.28
459.36	208.84	310.52	565.76
546.48	518.52	481.44	534.44
501.72	562	578	569.92
538.28	182.12	578.16	555.04
528.16	577.08	590.08	384.96
512.28	533.44	560.88	516.6
563.6	554.32	509.68	545.72
536.28	248.52	553.76	469.2
546.16	566.68	527.48	539.36
549.72	503.92	513.68	495.64
582.16	581.76	445.68	555.64
570.52	416.24	559.6	571.88
496.48	411.68	552.8	584.04
509.72	432.28	558.4	466.96
555.72	562.4	553.28	548.24
539.96	564.52	413.28	564.32
559.12	548.72	70.72	588.56
536.28	506.16	507.72
522.08	398.56	585.24
551.08	481.4	571.68
540.28		534.56
532.04
573.64
585.28
552.48
565.48
581
485.76
569.68

## Sheet: (+ -) aPN OF Velocity
0	0.01	0.02	0.1
8.79661	19.3008	7.49449	11.116
8.79338	21.5052	14.4935	11.0791
10.9449	13.3425	11.6241	15.2896
10.5477	3.89161	5.58982	9.80786
15.4922	12.5488	14.9072	8.9667
14.7497	11.7844	13.5843	11.8489
11.03	7.76573	14.4428	15.4822
10.461	21.3595	13.8582	5.47171
19.601	16.1063	8.92685	10.7635
16.782	20.0755	17.1881	8.29521
13.856	2.36101	11.342	8.82629
13.2642	15.9104	12.2715	13.9102
3.83895	9.77923	9.56545	7.16346
17.9655	16.0345	11.9701	13.6296
14.2091	4.00214	13.1863	15.1476
11.6188	6.69513	15.0656	10.2992
15.2496	8.93104	11.3949	8.77777
11.9144	13.4611	6.02303	17.8169
18.9448	15.374	5.80072	13.7311
14.2845	14.0288	1.47596	14.8572
10.5397	10.8822	13.1125
15.4385	11.7893	14.5755
15.4727	8.32755	16.6299
10.0827		14.4551
9.21673
18.0236
14.677
8.08848
9.33247
11.1515
9.25428
10.7383

## Sheet: (+ -) aPN OF Immobility
0	0.01	0.02	0.1
75.8	10.76	0.8	0.28
8.8	0	0	9.16
74.16	65.6	0.08	0.08
77.52	163.04	25.36	1.16
73.32	24.12	0.52	1.8
60.48	1.4	9.48	0.48
38.6	129.76	0.04	0.52
176.16	29.32	34.8	27.48
25.12	51.72	0.88	19.88
4.08	0	34.48	3.2
43.6	249.92	0.2	0.8
44.4	3.52	0.52	6.84
225.04	82.88	5.2	8.6
0	0.08	38.4	1.36
11.44	124.28	8.92	0.24
24.68	9.4	12.28	1.36
41.52	159.24	15.12	25.4
0.04	0.44	170.04	2.96
40.88	0.2	68.36	0.12
0.16	23.84	366.16	0.12
6.72	30.6	17.32
1.24	103.72	0.12
0.12	54.04	4.16
0.32		25.28
152.8
2.68
5.72
1.72
0.8
0.4
1.28
0.52

## Sheet: (+ -) aPN NOA Inner Zone
0	0.01	0.02	0.1
0.04	1	0	9.32
0	1.16	0	13.52
0	0	0	1.16
0.32	2.48	6.84	0
0	1.2	0.6	10.88
0.44	0.88	0	0.92
0.12	0	0	2.64
1.52	0.44	0	0
0.52	1.76	1.28	3.24
2.84	0	0	1.16
0	9.04	2.64	3.56
0.4	0.36	0	14.12
0	0	0	7.92
0	4.16	0	0.24
0.12	1.2	0.08	2.72
0.08	11.6	1.84	0
0.24	0.16	0.64	4.32
0.52	0	0	0.28
0.72	1.12	3.72	1.32
0.44	0.08	3.48	0
2.64	1.16	27.64
4.32	0.4	0.28
1.12	1.88	1.64
21.36		0
0.56
1.2
0
1.6
0.52
0
8.4
2.28

## Sheet: (+ -) aPN NOA Outer Zone
0	0.01	0.02	0.1
596.84	586.08	428.28	539.12
586.84	569.56	599.44	549.08
511.6	588.32	585.48	585.4
597.72	576.12	397.44	588.28
593.28	563.2	580.88	524.6
580.04	592.84	588.92	585.16
357.76	594	569.96	579.72
573.76	583.96	599.36	589.68
587.6	570	574.64	585.64
547.28	586.64	593.52	573.32
593.36	581.72	550.36	394.52
581.04	583.56	584.88	501.04
594.08	592.76	589.64	510.28
595.16	558.68	593	596.8
562.6	511.48	597.92	581
597.56	386	530.64	595.52
517.24	567.72	577.28	537.28
523.72	591.48	518.68	593.32
490.44	584.72	434.88	561.12
593.88	489.4	344.76	595.84
575	568.28	499.64
553.2	586.56	588.92
582.68	544.24	588.96
520.52		597.16
589.68
578.52
598.84
559.2
576.64
597.76
552.44
539.16

## Sheet: (+ -) aPN NOA Velocity
0	0.01	0.02	0.1
7.46401	21.1872	6.76698	9.05101
10.9821	21.855	0.555127	11.1044
4.96359	14.6877	10.7981	13.9047
6.2341	5.25349	2.65909	9.12823
17.802	13.0451	18.2845	6.50494
21.0895	8.09571	3.12294	10.929
2.16152	15.0649	13.8656	14.5209
20.1426	14.4387	1.00534	16.9107
6.94832	14.8969	8.57484	9.21904
13.0603	10.945	18.1584	8.82249
0.572431	2.07396	9.13909	7.31256
4.44818	16.3653	10.236	11.8906
1.41313	14.8993	14.4635	6.92324
18.4608	13.4598	13.1832	19.4983
12.6929	3.84456	15.1059	17.3321
12.7798	6.46502	9.65536	14.4271
12.4291	4.92704	12.5846	7.72155
9.75546	14.479	12.3897	19.3491
2.6894	17.0614	2.78689	11.3476
15.9099	3.58342	6.01184	15.8492
10.3551	15.5467	7.99732
14.6603	21.1713	15.9517
10.9716	2.42378	2.15119
11.522		15.1364
20.6683
16.3076
17.8785
7.58496
10.2641
12.9465
8.41991
9.10268

## Sheet: (+ -) aPN NOA Immobility
0	0.01	0.02	0.1
179.8	0.04	5.6	0.08
1.16	0	259.52	0.04
199.28	0.24	18.4	0
231.12	11.4	135.24	1.08
0	29.96	1.6	2.92
0.08	60.72	136.64	0.16
214.6	0.2	0.12	0.04
3.84	6.72	262.8	0.24
224.28	1.88	33.04	0.36
30.48	108.36	0	2.28
322.88	206.2	11.56	1.12
200.32	1.8	0.6	1.64
209.84	0	0.08	5.04
0	0.04	0.04	0.04
32.2	107.92	0.04	0.04
0.04	6.8	107.92	0.24
75.6	226.4	0.28	2.04
0.2	0	27.2	0
352.28	0	152.12	0.28
0	217.68	230.96	0.04
0.16	16.96	95.2
0.36	0	0.24
3.72	183.28	254.88
0.16		0.04
5.72
0
0
1.44
0.16
0.04
1.2
6.4

## Sheet: (-) aPN OF Inner Zone
0	0.01	0.02	0.1
65.84	8.68	180.84	21.88
3.24	2.24	3.04	179.64
7.52	5.44	2.44	53.12
28.32	2.84	3.92	19.24
10.56	12.88	14.88	199.84
7.04	9.2	3.92	11.28
4.48	4.8	0.32	250.16
3.4	14.32	1.68	95.16
7.04	7	1.04	172.72
0.52	21.04	3.88	134.52
11.88	31.56	2.28	102.6
44.32	11.28	34.76	74.2
6.76	12.52	3.12	96.8
4	5.4	32.92
13.36	2.48	1.84
40.92		36.84
4.76
106.2
3.04

## Sheet: (-) aPN OF Outer Zone
0	0.01	0.02	0.1
460	457.32	370.68	468.36
572.8	574.32	572.36	138.84
527.92	549.56	556.88	315.6
488.8	373.36	562.76	461.56
562.52	536.92	523.72	132.32
514.6	387.64	576.08	505.6
549.6	570.12	562.56	222.96
563.76	503.08	578.12	231.92
548.28	573.36	584.24	84.04
447.88	527.6	569.96	127.28
521.72	423.64	578.84	256.12
511.72	516.2	496.04	346.28
537.52	516.04	487	286.08
555.6	531.32	441.4
480.64	578.36	552.8
464.36		432.4
476.52
366.96
542.56

[truncated: 22 more sheets: (-) aPN OF Velocity, (-) aPN OF Immobility, (-) aPN NOA Inner Zone, (-) aPN NOA Outer Zone, (-) aPN NOA Velocity, (-) aPN NOA Immobility, (+) aPN OF Inner Zone, (+) aPN OF Outer Zone, (+) aPN OF Velocity, (+) aPN OF Immobility, (+) aPN NOA Inner Zone, (+) aPN NOA Outer Zone, (+) aPN NOA Velocity, (+) aPN NOA Immobility, BCP OF Inner Zone, BCP OF Outer Zone, BCP OF Velocity, BCP OF Immobility, BCP NOA Inner Zone, BCP NOA Outer Zone …]
